# Supplementary material
Source: Springer Nature journal article supplement (https://www.springermedizin.de/resource/supplementary/13075_2010_2873_MOESM3_ESM.pdf/9693080)

(a) Inflammation

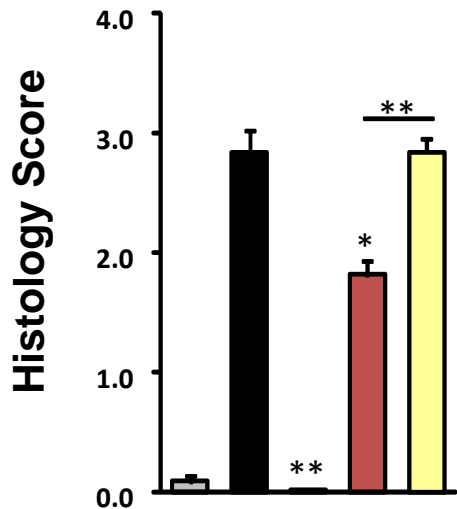

(b) Cartilage

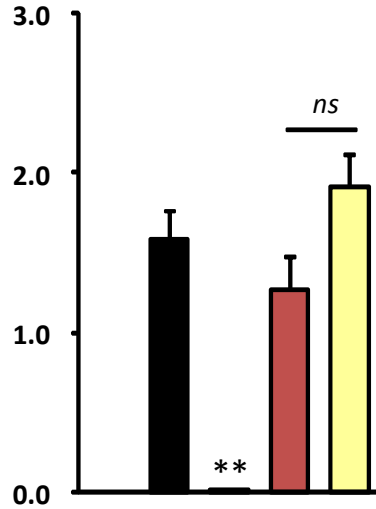

(c) Bone

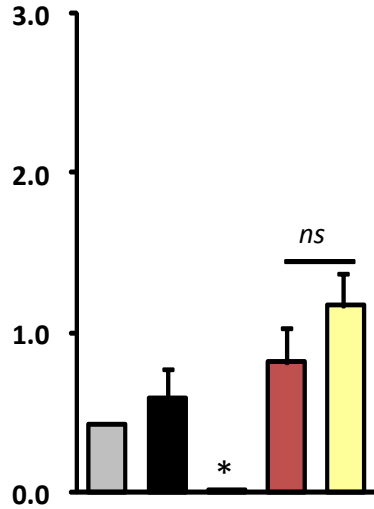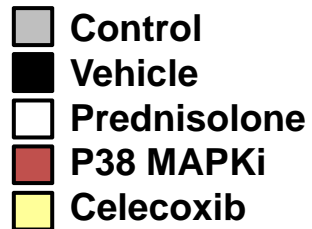

Supplement: MOESM3 [file 9693080]
